# Supplementary material for: Effects of Phenotypic Variation on Biological Properties of Endophytic Bacteria Bacillus mojavensis PS17
Source: MDPI journal article supplement (doi:10.3390/biology11091305), 2022-09-02
Supplement: s1 [file s1]

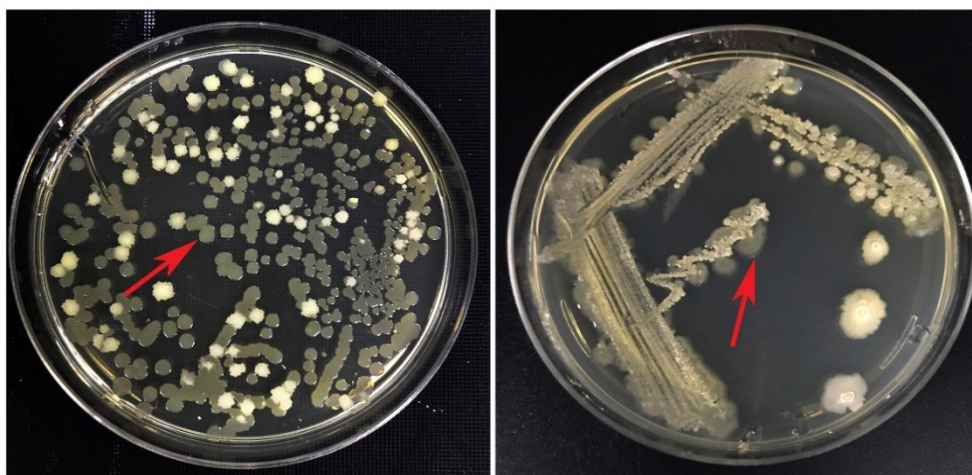

Figure S1. Phenotypic variation in *B. mojavensis* PS17. Red arrows indicated translucent colonies of *B. mojavensis* PS17.

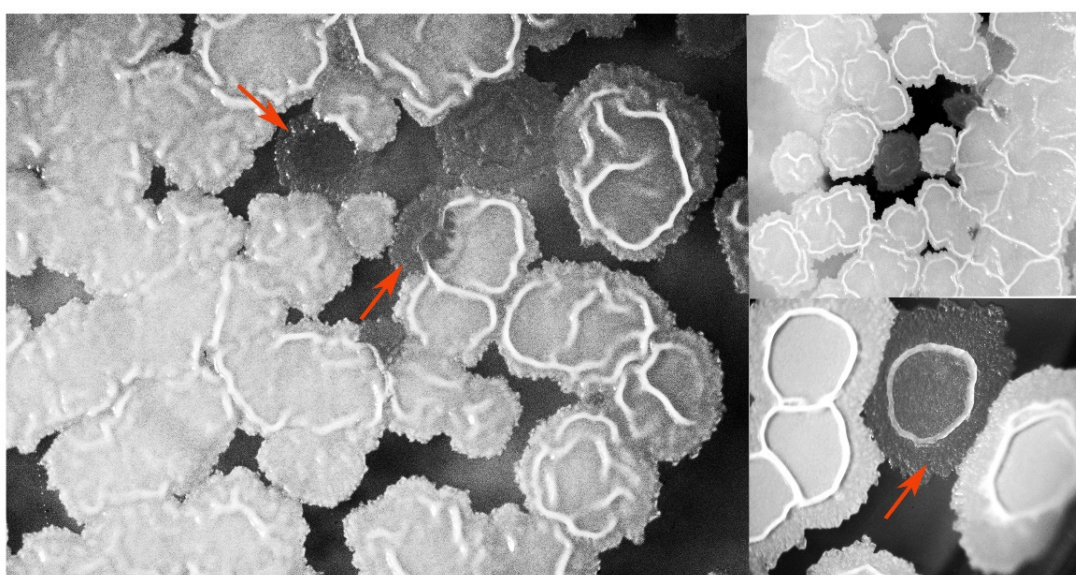

Figure S2 *B. mojavensis* PS17 observed under stereomicroscope (Zeiss Jena Technival 2, Germany). Red arrows indicated translucent colonies of *B. mojavensis* PS17.

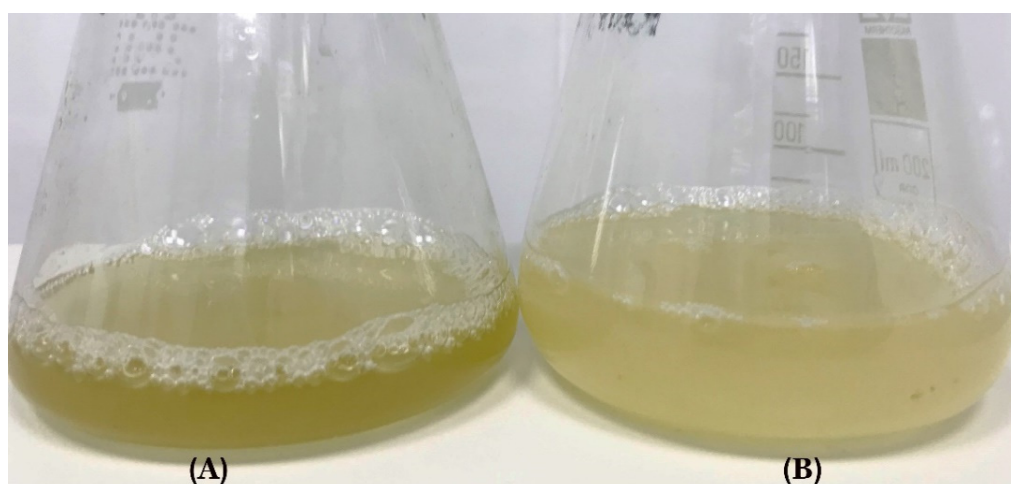

Figure S3 *B. mojavensis* strain PS17(II) (A) and PS17(I) (B) grown in LB medium
